# Supplementary material for: B-vitamin Supplementation Mitigates Effects of Fine Particles on Cardiac Autonomic Dysfunction and Inflammation: A Pilot Human Intervention Trial
Source: PubMed Central journal article supplement (PMC5377246; doi:10.1038/srep45322), 2017-04-03
Supplement: srep45322-s1.pdf [file srep45322-s1.pdf]

B-vitamin Supplementation Mitigates Effects of Fine Particles on Cardiac Autonomic Dysfunction and Inflammation: A Pilot Human Intervention Trial

Jia Zhong<sup>1\*</sup>, Letizia Trevisi<sup>2</sup>, Bruce Urch<sup>3</sup>, Xinyi Lin<sup>4</sup>, Mary Speck<sup>3</sup>, Brent A. Coull<sup>5</sup>, Gary Liss<sup>3</sup>, Aaron Thompson<sup>3</sup>, Shaowei Wu<sup>6</sup>, Ander Wilson<sup>5</sup>, Petros Koutrakis<sup>2</sup>, Frances Silverman<sup>3,7-9</sup>, Diane R. Gold<sup>2,10</sup>, and Andrea A. Baccarelli<sup>1</sup>

Zhong; Air Pollution, B Vitamins, and Trial

<sup>1</sup>Columbia University Mailman School of Public Health, New York, New York, USA

<sup>2</sup>Department of Environmental Health, Harvard T.H. Chan School of Public Health, Boston, Massachusetts, USA

<sup>3</sup>Division of Occupational & Environmental Health, Dalla Lana School of Public Health, University of Toronto, Toronto, Ontario, Canada;

<sup>4</sup>Singapore Institute for Clinical Sciences, Singapore

<sup>5</sup>Department of Biostatistics, Harvard T.H. Chan School of Public Health, Boston, Massachusetts, USA;

<sup>6</sup>Department of Occupational and Environmental Health Sciences, School of Public Health, Peking University, Beijing, China 100191

<sup>7</sup>Department of Medicine, University of Toronto, Toronto, Ontario, Canada

<sup>8</sup>Li Ka Shing Knowledge Institute, St Michael's Hospital, Toronto, Ontario, Canada

<sup>9</sup>Southern Ontario Centre for Atmospheric Aerosol Research, Toronto, Ontario, Canada

<sup>10</sup>Channing Laboratory, Brigham and Women's Hospital, Harvard Medical School, Boston, Massachusetts, USA.

\*Corresponding Author

Jia Zhong, ScD

Department of Environmental Health Sciences

Columbia University Mailman School of Public Health

630 West 168th Street, New York, NY 10032

E-mail: [jiazhong@mail.harvard.edu](mailto:jiazhong@mail.harvard.edu)

Phone: (202) 305-3067

Fax: (617) 432-6913

SUPPLEMENTAL MATERIAL

**Supplementary Table 1** Baseline characteristics of the study participants (N=10)

| Characteristics          | N (%)  | Resting Heart Rate |
|--------------------------|--------|--------------------|
|                          |        | Mean (SD)          |
| Age (years)              |        |                    |
| 19-29                    | 7 (70) | 62.3 (8.1)         |
| 30-49                    | 3 (30) | 51.0 (7.0)         |
| Gender                   |        |                    |
| Female                   | 6 (60) | 61.0 (8.9)         |
| Male                     | 4 (40) | 55.8 (10.0)        |
| Race                     |        |                    |
| White                    | 4 (40) | 52.0 (6.2)         |
| Asian                    | 3 (30) | 64.3 (8.5)         |
| Other                    | 3 (30) | 62.7 (9.5)         |
| BMI (kg/m <sup>2</sup> ) |        |                    |
| <25                      | 7 (70) | 62.1 (8.2)         |
| ≥25                      | 3 (30) | 51.3 (7.6)         |

SD, standard deviation; BMI, body mass index.

**Supplementary Table 2** Total exposure mass concentration of fine particles (PM<sub>2.5</sub>) across three exposure experiments

| Exposure*                                                        | Mean (SD)    | Median (IQR) | Minimum | Maximum | <i>P</i> <sup>†</sup> |
|------------------------------------------------------------------|--------------|--------------|---------|---------|-----------------------|
| Exposure 1 (Medical Air + Placebo) (µg/m <sup>3</sup> )          | --           | --           | --      | --      | --                    |
| Exposure 2 (PM <sub>2.5</sub> + Placebo) (µg/m <sup>3</sup> )    | 217.1 (50.6) | 219.1 (33.1) | 100.6   | 287.5   |                       |
| Exposure 3 (PM <sub>2.5</sub> + B vitamins) (µg/m <sup>3</sup> ) | 233.8 (31.2) | 237.2 (48.7) | 184.6   | 286.2   | 0.38                  |

SD, standard deviation; IQR, inter-quartile range.

\*Integrated gravimetric (filter sample) exposure concentrations sampled from PM<sub>2.5</sub> airstream inlet to human exposure chamber.

<sup>†</sup>*P* value from the paired T test.

**Supplementary Table 3** Plasma concentration of folate, vitamin B<sub>6</sub>, and vitamin B<sub>12</sub>, before each exposure experiment

|                                                    | Mean (SD) | Median (IQR) | Minimum | Maximum | <i>P</i> * |
|----------------------------------------------------|-----------|--------------|---------|---------|------------|
| Before Exposure 1 (Medical Air + Placebo)          |           |              |         |         |            |
| Folate (nmoles/L)                                  | 37 (9)    | 35 (14)      | 28      | 56      | --         |
| B <sub>6</sub> (nmoles/L)                          | 42 (11)   | 41 (16)      | 25      | 57      | --         |
| B <sub>12</sub> (pmoles/L)                         | 305 (107) | 292 (72)     | 173     | 486     | --         |
| Before Exposure 2 (PM <sub>2.5</sub> + Placebo)    |           |              |         |         |            |
| Folate (nmoles/L)                                  | 39 (13)   | 39 (24)      | 22      | 56      | 0.82       |
| B <sub>6</sub> (nmoles/L)                          | 87 (142)  | 37 (18)      | 19      | 482     | 0.75       |
| B <sub>12</sub> (pmoles/L)                         | 302 (99)  | 262 (214)    | 197     | 441     | 0.42       |
| Before Exposure 3 (PM <sub>2.5</sub> + B vitamins) |           |              |         |         |            |
| Folate (nmoles/L)                                  | 124 (186) | 56 (13)      | 27      | 638     | 0.02       |
| B <sub>6</sub> (nmoles/L)                          | 393 (224) | 428 (321)    | 23      | 708     | 0.004      |
| B <sub>12</sub> (pmoles/L)                         | 507 (166) | 511 (85)     | 176     | 794     | 0.01       |

SD, standard deviation; IQR, inter-quartile range.

\**P* value from the Wilcoxon signed-rank test; the measurement taken before exposure 1 was used as the reference group.

SUPPLEMENTAL MATERIAL

**Supplementary Table 4** Immediate change of post- vs pre-exposure heart rate (HR) and heart rate variability (HRV) associated with two-hour exposure to fine particles (PM<sub>2.5</sub>), and the attenuated PM<sub>2.5</sub> effect due to B vitamin supplementation (N=10)

|           | Effect of PM <sub>2.5</sub> without B vitamin supplementation |          |               | Effect of PM <sub>2.5</sub> with B vitamin supplementation |          |                | Intervention Effect |                                               |                |
|-----------|---------------------------------------------------------------|----------|---------------|------------------------------------------------------------|----------|----------------|---------------------|-----------------------------------------------|----------------|
|           | Estimate                                                      | <i>P</i> | 95% CI        | Estimate                                                   | <i>P</i> | 95% CI         | Estimate            | <i>P</i> <sub>intervention</sub> <sup>†</sup> | 95% CI         |
| ΔHR (bpm) | 3.8                                                           | 0.04     | 0.3 to 7.4    | -1.9                                                       | 0.14     | -4.6 to 0.7    | -5.8                | 0.003                                         | -9.2 to -2.3   |
|           | % Change*                                                     | <i>P</i> | 95% CI        | % Change*                                                  | <i>P</i> | 95% CI         | % Change*           | <i>P</i> <sub>intervention</sub> <sup>†</sup> | 95% CI         |
|           | Time Domain                                                   |          |               |                                                            |          |                |                     |                                               |                |
| ΔSDNN     | -33.6                                                         | 0.06     | -56.8 to 2.1  | -14.6                                                      | 0.47     | -45.6 to 34.3  | 28.6                | 0.16                                          | -10.8 to 85.4  |
| ΔrMSSD    | -14.8                                                         | 0.25     | -35.9 to 13.3 | -0.4                                                       | 0.97     | -23.1 to 28.9  | 16.9                | 0.26                                          | -12.0 to 55.3  |
| ΔPNN50    | -29.9                                                         | 0.15     | -57.4 to 15.2 | -6.8                                                       | 0.79     | -46.4 to 62.2  | 33.0                | 0.15                                          | -11.1 to 98.9  |
|           | Frequency Domain                                              |          |               |                                                            |          |                |                     |                                               |                |
| ΔLF       | -57.5                                                         | 0.04     | -81.5 to -2.5 | -5.8                                                       | 0.89     | -61.0 to 127.8 | 121.6               | 0.01                                          | 25.7 to 290.8  |
| ΔHF       | -34.3                                                         | 0.2      | -66.2 to 27.7 | -6.5                                                       | 0.81     | -48.2 to 68.8  | 42.0                | 0.19                                          | -17.5 to 145.8 |
| ΔLF/HF    | -35.9                                                         | 0.09     | -61.8 to 7.5  | -1.6                                                       | 0.94     | -37.5 to 55.0  | 53.6                | 0.06                                          | -1.6 to 140.0  |

HR indicates heart rate; SDNN indicates the standard deviation of normal-to-normal (NN) intervals; rMSSD indicates the root mean square of successive differences; PNN50 indicates percentage of differences between adjacent NN intervals that are greater than 50 milliseconds; LF indicates low-frequency power (0.04–0.15 Hz); HF indicates high-frequency power (0.15–0.4 Hz).

\*Represents the % change in post-exposure HRV/pre-exposure HRV ratio associated with PM<sub>2.5</sub> exposure, compared to medical air. Results were adjusted for chamber humidity, chamber temperature, and season (Spring/Summer/Fall/Winter).

<sup>†</sup>Represents the intervention effect of B vitamin supplementation (or effect modification by B vitamin supplementation).

SUPPLEMENTAL MATERIAL

**Supplementary Table 5** Change of 24-hour post- vs pre-exposure heart rate (HR) and heart rate variability (HRV) associated with two-hour exposure to fine particles (PM<sub>2.5</sub>), and the attenuated PM<sub>2.5</sub> effect due to B vitamin supplementation (N=10)

|           | Effect of PM <sub>2.5</sub> without B vitamin supplementation |          |                | Effect of PM <sub>2.5</sub> with B vitamin supplementation |          |                | Intervention Effect |                                               |                |
|-----------|---------------------------------------------------------------|----------|----------------|------------------------------------------------------------|----------|----------------|---------------------|-----------------------------------------------|----------------|
|           | Estimate                                                      | <i>P</i> | 95% CI         | Estimate                                                   | <i>P</i> | 95% CI         | Estimate            | <i>P</i> <sub>intervention</sub> <sup>†</sup> | 95% CI         |
| ΔHR (bpm) | 1.7                                                           | 0.37     | -2.3 to 5.7    | -0.4                                                       | 0.89     | -5.7 to 5.0    | -2.1                | 0.48                                          | -8.3 to 4.2    |
|           | % Change*                                                     | <i>P</i> | 95% CI         | % Change*                                                  | <i>P</i> | 95% CI         | % Change*           | <i>P</i> <sub>intervention</sub> <sup>†</sup> | 95% CI         |
|           | Time Domain                                                   |          |                |                                                            |          |                |                     |                                               |                |
| ΔSDNN     | -0.4                                                          | 0.98     | -26.3 to 34.5  | 11.0                                                       | 0.46     | -17.6 to 49.4  | 11.4                | 0.54                                          | -23.6 to 62.6  |
| ΔrMSSD    | -21.9                                                         | 0.16     | -45.4 to 11.8  | 10.2                                                       | 0.60     | -26.2 to 64.6  | 41.1                | 0.01                                          | 9.4 to 82.0    |
| ΔPNN50    | -26.3                                                         | 0.43     | -67.7 to 68.4  | 38.9                                                       | 0.42     | -41.7 to 230.9 | 88.4                | 0.03                                          | 5.7 to 235.7   |
|           | Frequency Domain                                              |          |                |                                                            |          |                |                     |                                               |                |
| ΔLF       | 8.4                                                           | 0.62     | -23.7 to 53.9  | 58.3                                                       | 0.08     | -5.5 to 165.4  | 46.1                | 0.13                                          | -12.3 to 143.4 |
| ΔHF       | -27.5                                                         | 0.38     | -66.5 to 56.5  | 42.0                                                       | 0.39     | -39.8 to 234.9 | 95.9                | 0.06                                          | -4.0 to 300.0  |
| ΔLF/HF    | 26.7                                                          | 0.57     | -48.2 to 209.6 | 19.8                                                       | 0.59     | -41.3 to 144.5 | -5.5                | 0.90                                          | -63.9 to 147.8 |

HR indicates heart rate; SDNN indicates the standard deviation of normal-to-normal (NN) intervals; rMSSD indicates the root mean square of successive differences; PNN(10/20/50) indicates percentage of differences between adjacent NN intervals that are greater than (10/20/50) milliseconds; LF indicates low-frequency power (0.04–0.15 Hz); HF indicates high-frequency power (0.15–0.4 Hz).

\*Represents the % change in 24-hour post-exposure HRV/pre-exposure HRV ratio associated with PM<sub>2.5</sub> exposure, compared to medical air. Results were adjusted for chamber humidity, chamber temperature, and season (Spring/Summer/Fall/Winter).

<sup>†</sup>Represents the intervention effect of B vitamin supplementation.

SUPPLEMENTAL MATERIAL

**Supplementary Table 6** Change of white blood cell (WBC) counts and distribution associated with two-hour exposure to fine particles (PM<sub>2.5</sub>), and the attenuated PM<sub>2.5</sub> effect due to B vitamin supplementation (N=10)

|                                  | Effect of PM <sub>2.5</sub> without B vitamin supplementation |          |               | Effect of PM <sub>2.5</sub> with B vitamin supplementation |          |               | Intervention Effect |                                               |               |
|----------------------------------|---------------------------------------------------------------|----------|---------------|------------------------------------------------------------|----------|---------------|---------------------|-----------------------------------------------|---------------|
|                                  | % Change*                                                     | <i>P</i> | 95% CI        | % Change*                                                  | <i>P</i> | 95% CI        | % Change*           | <i>P</i> <sub>intervention</sub> <sup>†</sup> | 95% CI        |
| Immediate post-pre change in WBC |                                                               |          |               |                                                            |          |               |                     |                                               |               |
| ΔWBC                             | 9.9                                                           | 0.07     | -0.8 to 21.8  | -1.7                                                       | 0.67     | -9.6 to 6.9   | -10.5               | 0.008                                         | -17.2 to -3.3 |
| ΔNeutrophil                      | 8.9                                                           | 0.28     | -7.5 to 28.2  | -3.1                                                       | 0.68     | -17.4 to 13.8 | -11.0               | 0.06                                          | -21.3 to 0.7  |
| ΔLymphocyte                      | 10.0                                                          | 0.09     | -1.7 to 23.2  | 2.4                                                        | 0.62     | -7.4 to 13.1  | -7.0                | 0.09                                          | -14.5 to 1.3  |
| ΔMonocyte                        | 6.5                                                           | 0.62     | -18.8 to 39.8 | 1.6                                                        | 0.86     | -16.6 to 23.9 | -4.6                | 0.63                                          | -22.6 to 17.6 |
| 24-hour post-pre change in WBC   |                                                               |          |               |                                                            |          |               |                     |                                               |               |
| ΔWBC                             | 11.5                                                          | 0.04     | 0.3 to 24.0   | -4.5                                                       | 0.43     | -15.5 to 8.0  | -14.4               | 0.006                                         | -22.6 to -5.2 |
| ΔNeutrophil                      | 12.9                                                          | 0.15     | -4.9 to 34.1  | -8.4                                                       | 0.32     | -23.6 to 9.9  | -18.9               | 0.01                                          | -30.2 to -5.8 |
| ΔLymphocyte                      | 12.9                                                          | 0.005    | 4.4 to 22.1   | -0.8                                                       | 0.87     | -11.2 to 10.7 | -12.2               | 0.02                                          | -21.2 to -2.1 |
| ΔMonocyte                        | 5.2                                                           | 0.36     | -6.4 to 18.3  | 7.5                                                        | 0.31     | -7.3 to 24.7  | 2.1                 | 0.61                                          | -6.4 to 11.4  |

\*Represents the % change in post-exposure cell count/pre-exposure cell count ratio associated with PM<sub>2.5</sub> exposure, compared to medical air. Results were adjusted for chamber humidity, chamber temperature, and season (Spring/Summer/Fall/Winter).

<sup>†</sup>Represents the intervention effect of B vitamin supplementation.

SUPPLEMENTAL MATERIAL

**Supplementary Table 7** Dietary intake of folic acid, vitamin B<sub>6</sub>, and vitamin B<sub>12</sub>, at screening and the end of study

|                         | Mean (SD)     | Median (IQR)  | Range         | Mean (SD)     | Median (IQR)  | Range        | <i>P</i> * |
|-------------------------|---------------|---------------|---------------|---------------|---------------|--------------|------------|
|                         | Screening     |               |               | End of Study  |               |              |            |
| Folic acid(mcg/d)       | 172.8 (105.7) | 161.5 (143.0) | 17.0 to 376.0 | 171.8 (121.7) | 169.0 (130.0) | 3.0 to 429.0 | 0.98       |
| B <sub>6</sub> (mg/d)   | 2.1 (0.8)     | 2.2 (0.6)     | 0.3 to 3.6    | 2.0 (0.7)     | 2.0 (1.1)     | 0.9 to 3.2   | 0.86       |
| B <sub>12</sub> (mcg/d) | 6.5 (4.1)     | 5.6 (4.1)     | 0.9 to 13.4   | 5.6 (2.2)     | 6.8 (2.5)     | 1.3 to 7.6   | 0.57       |

SD indicates standard deviation; IQR indicates inter-quartile range.

\**P* value from the paired T test.



SUPPLEMENTAL MATERIAL

**Supplementary Table 8** Effect of two-hour exposure to fine particles (PM<sub>2.5</sub>) and intervention effect of B vitamin supplementation on heart rate variability (HRV), normalized to heart rate (HR) (N=10)

|                         | Effect of PM <sub>2.5</sub> without B vitamin supplement |          |                | Effect of PM <sub>2.5</sub> with B vitamin supplement |          |                | Intervention Effect |                                    |                |
|-------------------------|----------------------------------------------------------|----------|----------------|-------------------------------------------------------|----------|----------------|---------------------|------------------------------------|----------------|
|                         | % Change*                                                | <i>P</i> | 95% CI         | % Change*                                             | <i>P</i> | 95% CI         | % Change*           | <i>P</i> <sub>intervention</sub> † | 95% CI         |
| Immediate post exposure |                                                          |          |                |                                                       |          |                |                     |                                    |                |
| Time Domain             |                                                          |          |                |                                                       |          |                |                     |                                    |                |
| ΔSDNN                   | -33.1                                                    | 0.06     | -56.2 to 2.2   | -13.4                                                 | 0.50     | -44.8 to 35.9  | 29.4                | 0.14                               | -9.5 to 85.1   |
| ΔrMSSD                  | -14.4                                                    | 0.29     | -36.9 to 16.3  | 1.0                                                   | 0.93     | -23.6 to 33.7  | 18.0                | 0.27                               | -13.7 to 61.3  |
| ΔPNN50                  | -29.5                                                    | 0.17     | -57.9 to 18.0  | -5.5                                                  | 0.84     | -46.9 to 68.2  | 34.0                | 0.16                               | -12.1 to 104.6 |
| Frequency Domain        |                                                          |          |                |                                                       |          |                |                     |                                    |                |
| ΔLF                     | -57.5                                                    | 0.04     | -81.3 to -3.5  | -4.8                                                  | 0.90     | -60.2 to 127.6 | 124.0               | 0.007                              | 29.3 to 288.1  |
| ΔHF                     | -34.0                                                    | 0.21     | -66.7 to 30.8  | -5.2                                                  | 0.85     | -48.5 to 74.6  | 43.7                | 0.19                               | -18.7 to 153.8 |
| ΔLF/HF                  | -35.6                                                    | 0.07     | -60.2 to 4.1   | -0.2                                                  | 0.99     | -35.2 to 53.9  | 55.0                | 0.03                               | 4.9 to 129.1   |
| 24-hour post exposure   |                                                          |          |                |                                                       |          |                |                     |                                    |                |
| Time Domain             |                                                          |          |                |                                                       |          |                |                     |                                    |                |
| ΔSDNN                   | -3.8                                                     | 0.79     | -29.5 to 31.4  | 10.9                                                  | 0.527    | -21.7 to 57.0  | 15.2                | 0.41                               | -20.2 to 66.3  |
| ΔrMSSD                  | -24.3                                                    | 0.17     | -49.9 to 14.5  | 9.9                                                   | 0.67     | -31.5 to 76.3  | 45.1                | 0.04                               | 2.9 to 104.7   |
| ΔPNN50                  | -28.5                                                    | 0.42     | -70.3 to 72.1  | 38.7                                                  | 0.46     | -45.8 to 254.9 | 93.9                | 0.05                               | 1.1 to 271.9   |
| Frequency Domain        |                                                          |          |                |                                                       |          |                |                     |                                    |                |
| ΔLF                     | 4.7                                                      | 0.80     | -29.0 to 54.3  | 58.7                                                  | 0.09     | -8.0 to 173.9  | 51.6                | 0.08                               | -6.5 to 146.0  |
| ΔHF                     | -29.7                                                    | 0.36     | -68.9 to 58.7  | 41.5                                                  | 0.43     | -44.2 to 258.8 | 101.5               | 0.07                               | -7.6 to 339.5  |
| ΔLF/HF                  | 22.8                                                     | 0.61     | -48.3 to 191.7 | 19.4                                                  | 0.57     | -39 to 133.5   | -2.8                | 0.95                               | -60.1 to 137.0 |

SDNN indicates the standard deviation of normal-to-normal (NN) intervals; rMSSD indicates the root mean square of successive differences; PNN50 indicates percentage of differences between adjacent NN intervals that are greater than 50 milliseconds; LF indicates low-frequency power (0.04–0.15 Hz); HF indicates high-frequency power (0.15–0.4 Hz).

SUPPLEMENTAL MATERIAL

\*Represents the % change in post-exposure HR-normalized HRV/pre-exposure HRV ratio associated with PM<sub>2.5</sub> exposure, compared to medical air. Results were adjusted for chamber humidity, chamber temperature, and season (Spring/Summer/Fall/Winter).

†Represents the intervention effect of B vitamin supplementation (or effect modification by B vitamin supplementation)
